# Supplementary material for: Homopolish: a method for the removal of systematic errors in nanopore sequencing by homologous polishing
Source: PubMed Central journal article supplement (PMC8011154; doi:10.1186/s13059-021-02282-6), 2021-03-31
Supplement: 13059_2021_2282_MOESM2_ESM.pdf [file 13059_2021_2282_MOESM2_ESM.pdf]

# Homopolish: a method for the removal of systematic errors in nanopore sequencing by homologous polishing (Supplementary Tables S1-10)

Yao-Ting Huang<sup>1</sup>, Po-Yu Liu<sup>2,3,4</sup>, and Pei-Wen Shih<sup>1</sup>

<sup>1</sup>*Department of Computer Science and Information Engineering,  
National Chung Cheng University, Chiayi, Taiwan.*

<sup>2</sup>*Department of Infectious Diseases, Taichung Veterans General  
Hospital, Taichung, Taiwan.*

<sup>3</sup>*Rong Hsing Research Center for Translational Medicine, National  
Chung Hsing University, Taichung, Taiwan.*

<sup>4</sup>*Ph.D. Program in Translational Medicine, National Chung Hsing  
University, Taichung, Taiwan.*

**Table S1:** Nanopore sequencing statistics of six bacteria. The read numbers, N50 read length, maximum read length, and sum of total read bases are listed for each strain.

| Nanopore sequencing |           |        |         |               |
|---------------------|-----------|--------|---------|---------------|
| Species             | No. Reads | N50    | Max     | Sum           |
| K. pneumoniae SAWA  | 406,263   | 17,529 | 122,092 | 842,252,640   |
| E. anopheles SUE    |           |        |         |               |
| S. algae VGH117     |           |        |         |               |
| S. algae HIDE       | 178,071   | 25,496 | 141,550 | 2,944,017,556 |
| P. vulgaris CCU063  | 161,898   | 10,271 | 49,577  | 1,292,396,754 |
| P. vulgaris GOKU    | 33,172    | 9,292  | 79,283  | 163,089,117   |

**Table S2:** Illumina sequencing statistics of six bacteria. The read numbers, N50 read length, maximum read length, and sum of total read bases are listed for each strain.

| Illumina sequencing |           |     |     |             |
|---------------------|-----------|-----|-----|-------------|
| Species             | No. Reads | N50 | Max | Sum         |
| K. pneumoniae SAWA  | 2,204,942 | 151 | 151 | 332,946,242 |
| E. anopheles SUE    | 2,518,328 | 151 | 151 | 380,267,528 |
| S. algae VGH117     | 2,295,502 | 151 | 151 | 346,620,802 |
| S. algae HIDE       | 2,166,486 | 151 | 151 | 327,139,386 |
| P. vulgaris CCU063  | 2,647,252 | 151 | 151 | 399,735,052 |
| P. vulgaris GOKU    | 2,723,350 | 151 | 151 | 411,225,850 |

**Table S3:** Nanopore sequencing statistics of two public metagenomic datasets (ZymoBIOMICS Microbial Community Standard) by Loman Lab (Nicholls et al., 2019). The read numbers, N50 read length, maximum read length, and sum of total read bases are listed for each dataset.

| Version | No. Reads | N50    | Max     | Sum     |
|---------|-----------|--------|---------|---------|
| R9.4    | 3,238,505 | 5,331  | 320,098 | 13.63Gb |
| R10.3   | 1,160,526 | 26,245 | 249,289 | 4.4Gb   |

**Table S4:** Statistic of reference genomes of in-house sequenced isolates (ground truth) reconstructed via hybrid assembly. The contig numbers and genome sizes are listed for each strain.

| Isolate dataset ground truth |             |             |
|------------------------------|-------------|-------------|
| Species                      | No. Contigs | Genome size |
| <i>K. pneumoniae</i> SAWA    | 1           | 5,403,374   |
| <i>E. anopheles</i> SUE      | 1           | 4,201,198   |
| <i>S. algae</i> VGH117       | 1           | 4,796,801   |
| <i>S. algae</i> HIDE         | 1           | 4,950,784   |
| <i>P. vulgaris</i> CCU063    | 1           | 4,141,308   |
| <i>P. vulgaris</i> GOKU      | 1           | 4,141,320   |

**Table S5:** Statistics of metagenomic assembly from the ZymoBIOMICS dataset

| Assembly data                 |             |             |
|-------------------------------|-------------|-------------|
| Species                       | No. contigs | Genome size |
| <i>Enterococcus faecalis</i>  | 1           | 2,867,861   |
| <i>Escherichia coli</i>       | 1           | 4,780,323   |
| <i>Pseudomonas aeruginosa</i> | 1           | 6,800,605   |
| <i>Staphylococcus aureus</i>  | 1           | 2,737,456   |
| <i>Bacillus subtilis</i>      | 1           | 4,069,116   |
| <i>Salmonella enterica</i>    | 1           | 4,774,301   |
| <i>Listeria monocytogenes</i> | 1           | 3,013,178   |

**Table S6:** Assembly statistics of public and in-house isolates by Nanopore-only sequencing.

| Assembly data             |             |             |
|---------------------------|-------------|-------------|
| Species                   | No. contigs | Genome size |
| <i>K. pneumoniae</i> SAWA | 1           | 5,419,444   |
| <i>E. anopheles</i> SUE   | 1           | 4,214,907   |
| <i>S. algae</i> VGH117    | 1           | 4,809,726   |
| <i>S. algae</i> HIDE      | 1           | 4,963,570   |
| <i>P. vulgaris</i> CCU063 | 1           | 4,153,753   |
| <i>P. vulgaris</i> GOKU   | 1           | 4,172,433   |
| <i>E. coli</i> K-12       | 1           | 4,637,729   |

**Table S7:** Comparison of Q scores and numbers of mismatches/indel errors for Flye, Racon, Medaka, MarginPolish, HELEN, and Homopolish over the Zymo-BIOMICS Microbial Community Standard metagenomic dataset sequenced by R9.4 flowcells

| Species                       | Methods                           | Q score | Median Qscore | Mismatches | Insertions | Deletions |
|-------------------------------|-----------------------------------|---------|---------------|------------|------------|-----------|
| <i>Enterococcus faecalis</i>  | Flye                              | 22.1    | 22.07         | 389        | 17007      | 253       |
|                               | Racon 4x                          | 27.12   | 28.51         | 414        | 1303       | 3808      |
|                               | Racon 4x + Medaka                 | 37.18   | 37.7          | 131        | 253        | 157       |
|                               | Racon 4x + Hompolish              | 31.74   | 38.24         | 420        | 57         | 1431      |
|                               | MarginPolish                      | 33.74   | 33.98         | 69         | 754        | 372       |
|                               | MarginPolish + HELEN              | 41.87   | 43.98         | 34         | 63         | 86        |
|                               | MarginPolish + Homopolish         | 43.47   | 50            | 71         | 33         | 23        |
|                               | Racon 4x + Medaka + Homopolish    | 42.06   | 45.23         | 132        | 25         | 19        |
| <i>Escherichia coli</i>       | MarginPolish + HELEN + Homopolish | 43.67   | 50            | 53         | 27         | 41        |
|                               | Flye                              | 25.23   | 25.46         | 603        | 11115      | 310       |
|                               | Racon 4x                          | 30.33   | 31            | 685        | 488        | 2531      |
|                               | Racon 4x + Medaka                 | 35.2    | 37.96         | 527        | 422        | 260       |
|                               | Racon 4x + Hompolish              | 36.33   | 39.39         | 697        | 122        | 112       |
|                               | MarginPolish                      | 34.31   | 36.02         | 464        | 521        | 494       |
|                               | MarginPolish + HELEN              | 35.63   | 38.54         | 477        | 229        | 384       |
|                               | MarginPolish + Homopolish         | 37.48   | 41.55         | 484        | 132        | 97        |
| <i>Pseudomonas aeruginosa</i> | Racon 4x + Medaka + Homopolish    | 37.24   | 41.87         | 521        | 130        | 104       |
|                               | MarginPolish + HELEN + Homopolish | 37.44   | 41.25         | 471        | 127        | 120       |
|                               | Flye                              | 26.39   | 26.5          | 738        | 14394      | 439       |
|                               | Racon 4x                          | 32.78   | 33.19         | 622        | 538        | 2417      |
|                               | Racon 4x + Medaka                 | 36.54   | 37.96         | 476        | 704        | 324       |
|                               | Racon 4x + Hompolish              | 39.43   | 43.01         | 622        | 24         | 128       |
|                               | MarginPolish                      | 34.93   | 35.85         | 449        | 1096       | 637       |
|                               | MarginPolish + HELEN              | 41.48   | 46.99         | 149        | 78         | 256       |
| <i>Staphylococcus aureus</i>  | MarginPolish + Homopolish         | 40.74   | 50            | 440        | 7          | 126       |
|                               | Racon 4x + Medaka + Homopolish    | 40.55   | 46.99         | 474        | 4          | 120       |
|                               | MarginPolish + HELEN + Homopolish | 42.81   | 90            | 205        | 5          | 146       |
|                               | Flye                              | 22.88   | 22.9          | 876        | 12911      | 177       |
|                               | Racon 4x                          | 29.96   | 29.94         | 365        | 1012       | 1341      |
|                               | Racon 4x + Medaka                 | 35.79   | 36.2          | 247        | 274        | 190       |
|                               | Racon 4x + Hompolish              | 37.31   | 37.83         | 367        | 38         | 96        |
|                               | MarginPolish                      | 33.07   | 33.37         | 232        | 845        | 253       |
| <i>Bacillus subtilis</i>      | MarginPolish + HELEN              | 38.1    | 38.7          | 61         | 172        | 184       |
|                               | MarginPolish + Homopolish         | 38.52   | 40            | 232        | 23         | 124       |
|                               | Racon 4x + Medaka + Homopolish    | 38.69   | 39.39         | 247        | 24         | 93        |
|                               | MarginPolish + HELEN + Homopolish | 41.25   | 44.58         | 63         | 21         | 118       |
|                               | Flye                              | 23.31   | 23.31         | 347        | 18254      | 347       |
|                               | Racon 4x                          | 28.66   | 28.64         | 447        | 1544       | 3514      |
|                               | Racon 4x + Medaka                 | 36.51   | 37.21         | 103        | 475        | 325       |
|                               | Racon 4x + Hompolish              | 36.44   | 36.78         | 450        | 146        | 322       |
| <i>Salmonella enterica</i>    | MarginPolish                      | 34.77   | 35.23         | 36         | 677        | 635       |
|                               | MarginPolish + HELEN              | 37.28   | 37.7          | 30         | 317        | 409       |
|                               | MarginPolish + Homopolish         | 40.6    | 45.23         | 49         | 102        | 201       |
|                               | Racon 4x + Medaka + Homopolish    | 40.17   | 43.01         | 103        | 95         | 191       |
|                               | MarginPolish + HELEN + Homopolish | 40.83   | 43.98         | 31         | 89         | 214       |
|                               | Flye                              | 25.23   | 25.25         | 203        | 11446      | 280       |
|                               | Racon 4x                          | 30.72   | 31.08         | 339        | 448        | 2611      |
|                               | Racon 4x + Medaka                 | 37.3    | 38.86         | 190        | 340        | 217       |
| <i>Listeria monocytogenes</i> | Racon 4x + Hompolish              | 40.18   | 43.01         | 340        | 14         | 31        |
|                               | MarginPolish                      | 34.81   | 35.53         | 63         | 637        | 623       |
|                               | MarginPolish + HELEN              | 37.77   | 38.54         | 36         | 214        | 417       |
|                               | MarginPolish + Homopolish         | 45.31   | 50            | 70         | 20         | 28        |
|                               | Racon 4x + Medaka + Homopolish    | 42.51   | 50            | 186        | 13         | 26        |
|                               | MarginPolish + HELEN + Homopolish | 46.72   | 50            | 36         | 13         | 36        |
|                               | Flye                              | 22.65   | 22.58         | 174        | 11034      | 120       |
|                               | Racon 4x                          | 27.5    | 28.81         | 267        | 1277       | 2153      |
| <i>Listeria monocytogenes</i> | Racon 4x + Medaka                 | 31.82   | 38.54         | 94         | 669        | 605       |
|                               | Racon 4x + Hompolish              | 31.87   | 38.54         | 266        | 540        | 545       |
|                               | MarginPolish                      | 31.24   | 36.2          | 42         | 846        | 675       |
|                               | MarginPolish + HELEN              | 32.03   | 39.68         | 44         | 655        | 603       |
|                               | MarginPolish + Homopolish         | 32.68   | 46.99         | 42         | 538        | 540       |
|                               | Racon 4x + Medaka + Homopolish    | 32.48   | 43.47         | 94         | 538        | 541       |
|                               | MarginPolish + HELEN + Homopolish | 32.67   | 46.99         | 44         | 539        | 540       |

**Table S8:** Comparison of Q scores and numbers of mismatches/indel errors for Flye, Racon, Medaka, MarginPolish, HELEN, and Homopolish on bacterial isolates datasets sequenced by R9.4 flowcells

| Species                   | Methods                           | Avg Q score | Median Q score | Mismatches | Insertions | Deletions |
|---------------------------|-----------------------------------|-------------|----------------|------------|------------|-----------|
| <i>E. Coli K-12</i>       | Flye                              | 22.09       | 22.25          | 14241      | 6248       | 8193      |
|                           | Racon 4x                          | 21.68       | 21.83          | 10743      | 3349       | 17450     |
|                           | Racon 4x + Medaka                 | 25.85       | 26.22          | 708        | 830        | 10537     |
|                           | Racon 4x + Hompolish              | 25.92       | 26.31          | 10742      | 201        | 917       |
|                           | MarginPolish                      | 21.94       | 22.11          | 10742      | 2076       | 16893     |
|                           | MarginPolish + HELEN              | 20.77       | 20.73          | 8918       | 4200       | 21383     |
|                           | MarginPolish + Homopolish         | 25.92       | 26.35          | 10738      | 191        | 941       |
|                           | Racon 4x + Medaka + Homopolish    | 34.15       | 37.96          | 708        | 181        | 894       |
| <i>K. pneumoniae SAWA</i> | MarginPolish + HELEN + Homopolish | 26.18       | 26.19          | 9210       | 290        | 716       |
|                           | Flye                              | 20.79       | 20.78          | 16431      | 22205      | 6255      |
|                           | Racon 4x                          | 22.49       | 22.49          | 11511      | 5637       | 13111     |
|                           | Racon 4x + Medaka                 | 28.06       | 28.1           | 895        | 1770       | 5769      |
|                           | Racon 4x + Hompolish              | 26.6        | 26.52          | 11623      | 97         | 89        |
|                           | MarginPolish                      | 22.8        | 22.8           | 9778       | 3405       | 14925     |
|                           | MarginPolish + HELEN              | 22.27       | 22.22          | 7904       | 4776       | 19117     |
|                           | MarginPolish + Homopolish         | 27.31       | 27.33          | 9874       | 64         | 88        |
| <i>E. anopheles SUE</i>   | Racon 4x + Medaka + Homopolish    | 37.34       | 38.86          | 896        | 57         | 43        |
|                           | MarginPolish + HELEN + Homopolish | 28.14       | 28.18          | 7983       | 74         | 232       |
|                           | Flye                              | 22.25       | 22.2           | 1363       | 18718      | 5039      |
|                           | Racon 4x                          | 23.57       | 23.57          | 1163       | 6097       | 11215     |
|                           | Racon 4x + Medaka                 | 26.43       | 26.48          | 566        | 1114       | 7891      |
|                           | Racon 4x + Hompolish              | 33.11       | 33.57          | 1224       | 384        | 443       |
|                           | MarginPolish                      | 25.57       | 25.61          | 389        | 1055       | 10198     |
|                           | MarginPolish + HELEN              | 23.89       | 23.91          | 669        | 4614       | 11753     |
| <i>S. algae VGH117</i>    | MarginPolish + Homopolish         | 35.8        | 37.21          | 447        | 222        | 435       |
|                           | Racon 4x + Medaka + Homopolish    | 35.32       | 36.38          | 611        | 216        | 407       |
|                           | MarginPolish + HELEN + Homopolish | 33.57       | 34.44          | 723        | 342        | 774       |
|                           | Flye                              | 23.74       | 23.7           | 1307       | 15982      | 3054      |
|                           | Racon 4x                          | 26.48       | 26.53          | 1262       | 3103       | 6423      |
|                           | Racon 4x + Medaka                 | 29.58       | 29.69          | 558        | 1028       | 3695      |
|                           | Racon 4x + Hompolish              | 32.3        | 33.01          | 1399       | 562        | 863       |
|                           | MarginPolish                      | 28.08       | 28.11          | 582        | 989        | 5896      |
| <i>S. algae HIDE</i>      | MarginPolish + HELEN              | 27.6        | 27.66          | 523        | 1370       | 6449      |
|                           | MarginPolish + Homopolish         | 33.76       | 34.69          | 702        | 407        | 907       |
|                           | Racon 4x + Medaka + Homopolish    | 34.57       | 35.53          | 639        | 340        | 696       |
|                           | MarginPolish + HELEN + Homopolish | 33.59       | 35.02          | 659        | 424        | 1014      |
|                           | Flye                              | 23.97       | 23.92          | 1122       | 15674      | 2937      |
|                           | Racon 4x                          | 26.16       | 26.16          | 1034       | 2459       | 8414      |
|                           | Racon 4x + Medaka                 | 29.7        | 29.79          | 465        | 1013       | 3790      |
|                           | Racon 4x + Hompolish              | 32.42       | 33.23          | 1189       | 508        | 1117      |
| <i>P. vulgaris CCU063</i> | MarginPolish                      | 28.24       | 28.23          | 438        | 854        | 6088      |
|                           | MarginPolish + HELEN              | 27.87       | 27.95          | 391        | 1187       | 6453      |
|                           | MarginPolish + Homopolish         | 34.48       | 35.02          | 571        | 284        | 897       |
|                           | Racon 4x + Medaka + Homopolish    | 35.05       | 35.23          | 541        | 283        | 714       |
|                           | MarginPolish + HELEN + Homopolish | 33.91       | 34.26          | 552        | 369        | 1076      |
|                           | Flye                              | 23.5        | 23.56          | 783        | 14945      | 2819      |
|                           | Racon 4x                          | 24.21       | 24.2           | 1047       | 2767       | 11904     |
|                           | Racon 4x + Medaka                 | 27.68       | 27.75          | 345        | 458        | 6266      |
| <i>P. vulgaris GOKU</i>   | Racon 4x + Hompolish              | 28.72       | 29.05          | 1716       | 1228       | 2620      |
|                           | MarginPolish                      | 26.58       | 26.62          | 170        | 874        | 8064      |
|                           | MarginPolish + HELEN              | 26.58       | 26.68          | 169        | 1283       | 7663      |
|                           | MarginPolish + Homopolish         | 31.18       | 31.46          | 635        | 662        | 1861      |
|                           | Racon 4x + Medaka + Homopolish    | 31.51       | 32.01          | 710        | 567        | 1647      |
|                           | MarginPolish + HELEN + Homopolish | 30.71       | 31.02          | 711        | 767        | 2040      |
|                           | Flye                              | 20.56       | 20.5           | 1501       | 33165      | 2059      |
|                           | Racon 4x                          | 20.91       | 20.85          | 3337       | 22954      | 7497      |
| <i>P. vulgaris GOKU</i>   | Racon 4x + Medaka                 | 23.97       | 24.02          | 1315       | 12180      | 3136      |
|                           | Racon 4x + Hompolish              | 25.85       | 26.5           | 4087       | 4745       | 1939      |
|                           | MarginPolish                      | 22.49       | 22.53          | 1127       | 17146      | 5168      |
|                           | MarginPolish + HELEN              | 26.58       | 26.68          | 169        | 1283       | 7663      |
|                           | MarginPolish + Homopolish         | 27.77       | 28.39          | 1846       | 3685       | 1397      |
|                           | Racon 4x + Medaka + Homopolish    | 28.77       | 29.3           | 1830       | 2572       | 1096      |
|                           | MarginPolish + HELEN + Homopolish | 24.32       | 24.84          | 4979       | 4526       | 4887      |

**Table S9:** Comparison of Q scores, mismatches, insertions, and deletions produced by Flye, Racon, Medaka, HELEN, and Homopolish on the metagenomic dataset and one isolate (E coli K12 MG1655) sequenced by R10.3 flowcells

| Species                | Methods                        | Avg. Q score | Median Q score | Mismatches | Insertions | Deletions |
|------------------------|--------------------------------|--------------|----------------|------------|------------|-----------|
| Enterococcus faecalis  | Flye                           | 39.45        | 40             | 70         | 59         | 194       |
|                        | HELEN                          | 45.02        | 90             | 58         | 25         | 5         |
|                        | Racon 4x                       | 39.52        | 40.46          | 94         | 116        | 108       |
|                        | Racon 4x + Medaka              | 44.54        | 50             | 57         | 21         | 22        |
|                        | Racon 4x + Medaka + Homopolish | 45.2         | 90             | 57         | 23         | 6         |
| Escherichia coli       | Flye                           | 34.45        | 35.45          | 749        | 175        | 659       |
|                        | HELEN                          | 37.7         | 41.25          | 564        | 83         | 155       |
|                        | Racon 4x                       | 34.46        | 35.69          | 920        | 237        | 533       |
|                        | Racon 4x + Medaka              | 37.86        | 41.55          | 559        | 84         | 129       |
|                        | Racon 4x + Medaka + Homopolish | 38.15        | 40.97          | 547        | 92         | 83        |
| Pseudomonas aeruginosa | Flye                           | 36.57        | 37.96          | 480        | 149        | 864       |
|                        | HELEN                          | 40.85        | 53.01          | 411        | 12         | 132       |
|                        | Racon 4x                       | 37.5         | 39.59          | 591        | 104        | 511       |
|                        | Racon 4x + Medaka              | 40.46        | 50             | 420        | 48         | 142       |
|                        | Racon 4x + Medaka + Homopolish | 41.01        | 90             | 420        | 0          | 118       |
| Staphylococcus aureus  | Flye                           | 28.39        | 28.57          | 999        | 2750       | 195       |
|                        | HELEN                          | 35.24        | 36.58          | 86         | 95         | 633       |
|                        | Racon 4x                       | 27.43        | 27.43          | 1474       | 3020       | 428       |
|                        | Racon 4x + Medaka              | 29.46        | 29.38          | 1112       | 1595       | 371       |
|                        | Racon 4x + Medaka + Homopolish | 33.42        | 33.77          | 1118       | 12         | 106       |
| Bacillus subtilis      | Flye                           | 38.09        | 39.21          | 25         | 92         | 506       |
|                        | HELEN                          | 41.23        | 45.23          | 22         | 113        | 170       |
|                        | Racon 4x                       | 38.34        | 40             | 69         | 162        | 362       |
|                        | Racon 4x + Medaka              | 41.68        | 46.99          | 20         | 86         | 169       |
|                        | Racon 4x + Medaka + Homopolish | 41.97        | 50             | 20         | 80         | 157       |
| Salmonella enterica    | Flye                           | 34.24        | 34.44          | 456        | 623        | 708       |
|                        | HELEN                          | 40.54        | 42.22          | 44         | 93         | 283       |
|                        | Racon 4x                       | 35.73        | 35.69          | 380        | 403        | 489       |
|                        | Racon 4x + Medaka              | 46.73        | 50             | 30         | 34         | 37        |
|                        | Racon 4x + Medaka + Homopolish | 48.32        | 53.01          | 30         | 23         | 17        |
| Listeria monocytogenes | Flye                           | 32.91        | 42.22          | 54         | 535        | 942       |
|                        | HELEN                          | 33.15        | 46.99          | 57         | 544        | 845       |
|                        | Racon 4x                       | 32.72        | 40.54          | 87         | 604        | 909       |
|                        | Racon 4x + Medaka              | 33.32        | 50             | 45         | 527        | 820       |
|                        | Racon 4x + Medaka + Homopolish | 33.26        | 48.24          | 46         | 535        | 833       |
| E coli K12 (isolate)   | Racon 4x + Medaka              | 35.97        | 46.99          | 23         | 221        | 928       |
|                        | Racon 4x + Medaka + Homopolish | 36.28        | 90             | 23         | 182        | 887       |
|                        | HELEN                          | 40.54        | 42.22          | 44         | 93         | 283       |

**Table S10:** Comparison of label frequencies before and after removing duplicate feature vectors

| Label        | Frequency  |        |
|--------------|------------|--------|
|              | before     | after  |
| Insertion A  | 4,683      | 4,683  |
| Insertion T  | 4,463      | 4,463  |
| Insertion C  | 1,799      | 1,799  |
| Insertion G  | 1,625      | 1,625  |
| Deletion     | 14,935     | 14,935 |
| No Deletion  | 30,208,536 | 38,020 |
| No Insertion | 7,849      | 7,849  |
